# Supplementary material
Source: PubMed Central journal article supplement (PMC7645247)
Supplement: EMBR-21-e49416-s001.pdf [file EMBR-21-e49416-s001.pdf]

## Prominin-1-Radixin Axis controls hepatic gluconeogenesis by regulating PKA activity

Prom1 regulates hepatic PKA signaling.

|                                                                                                                    | Page |
|--------------------------------------------------------------------------------------------------------------------|------|
| Appendix Figure S1. Genotyping of WT, heterozygote, and <i>Prom1</i> <sup>cre-ert2-nlacZ</sup>                     | 2    |
| Appendix Figure S2. Relative expression levels of <i>Pkia</i> , <i>Pkib</i> and <i>Pkig</i> in primary hepatocytes | 3    |
| Appendix Figure S3. The intracellular localization of CREB in primary hepatocytes                                  | 4    |

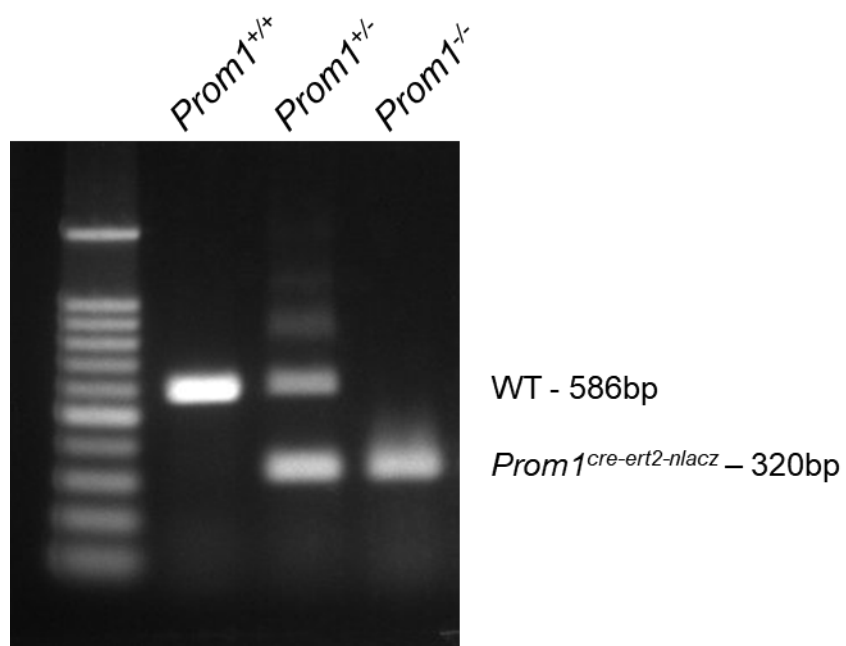

**Appendix Figure S1** - Genotyping of WT, Prom +/-, and Prom -/- mice using the following PCR primer sequences: common forward; 5-CAGGCTGTAGCTTGGGTTC-3, WT reverse; 5-TGCTGATTGCCTTCTGTCTG-3, *Prom1*<sup>cre-ert2-nlacZ</sup> reverse; 5-AGGCAAATTTGGTGTACGG.

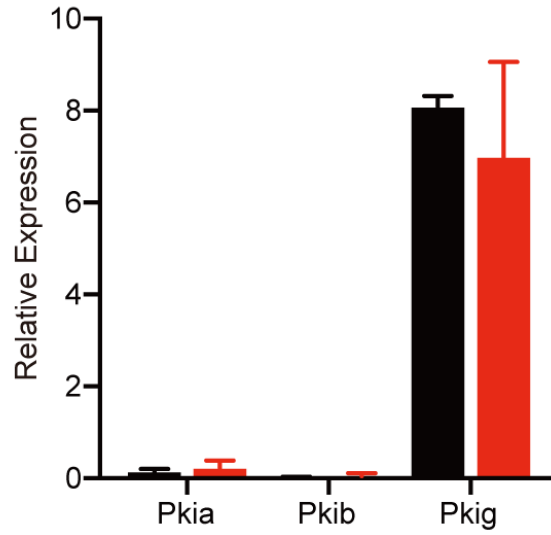

**Appendix Figure S2** - Relative expression levels of *Pkia*, *Pkib* and *Pkig* in primary hepatocytes from *Prom1*<sup>+/+</sup> (WT, black-colored bar) or *Prom1*<sup>-/-</sup> (KO, red-colored bar) mice were determined using RNA-seq.
