# Supplementary material
Source: PubMed Central journal article supplement (PMC7645247)
Supplement: EMBR-21-e49416-s007.pdf [file EMBR-21-e49416-s007.pdf]

Figure 5C-E

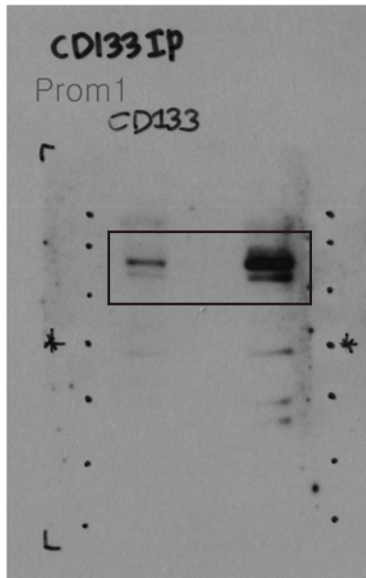

Figure 5D

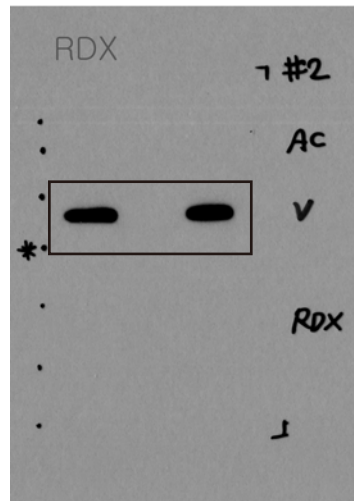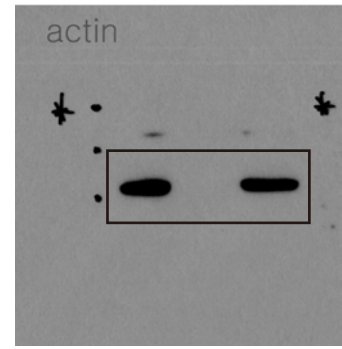

Figure 5E

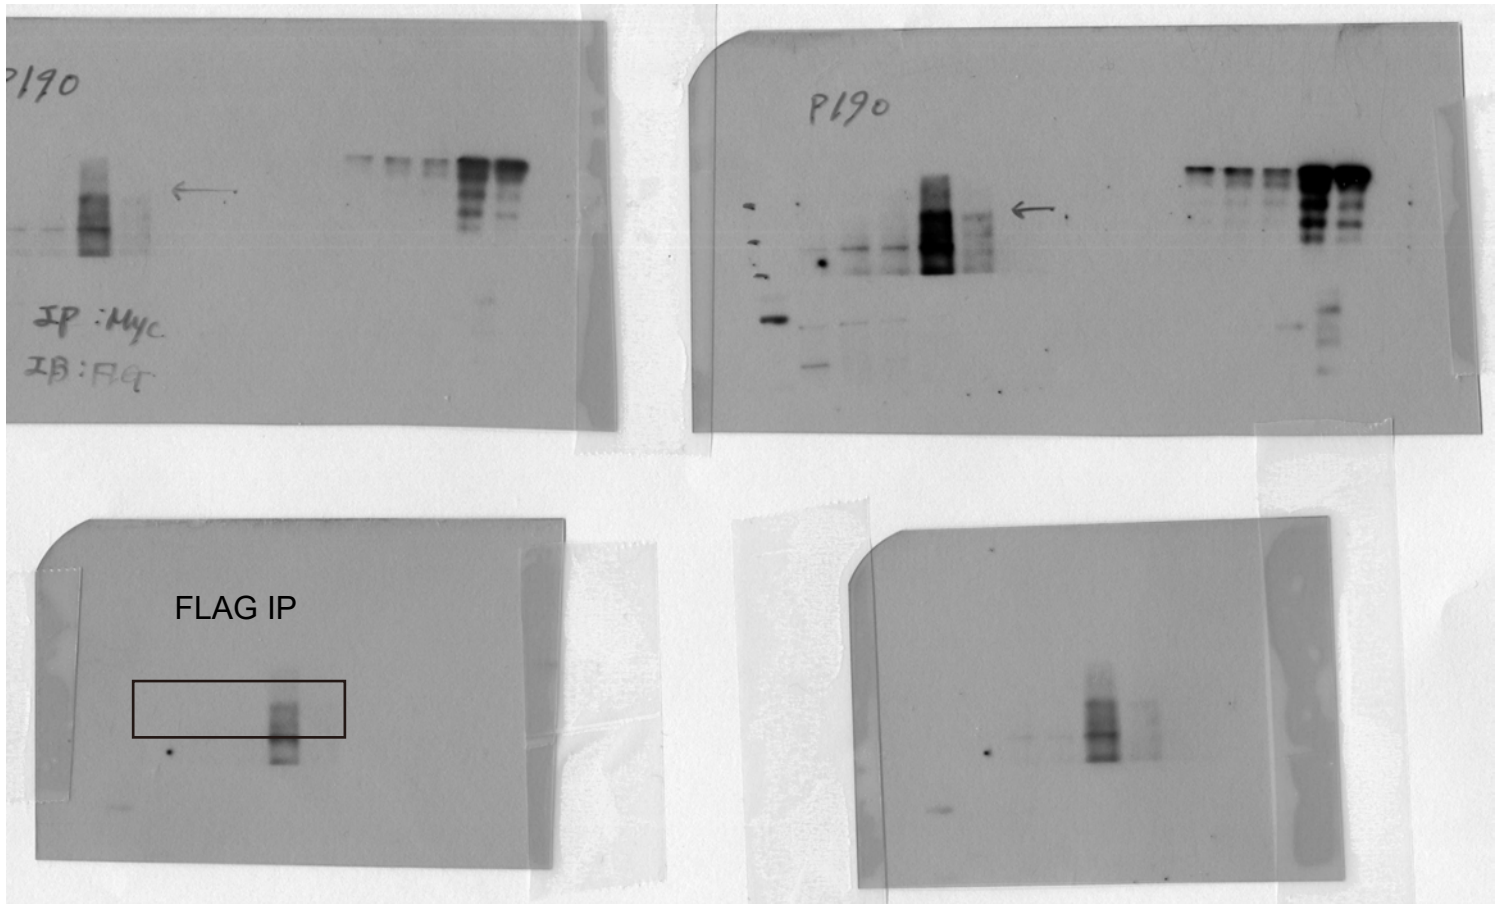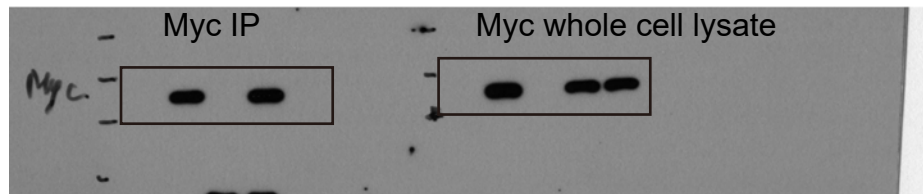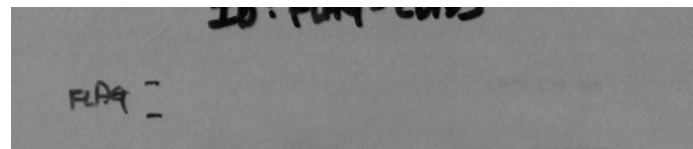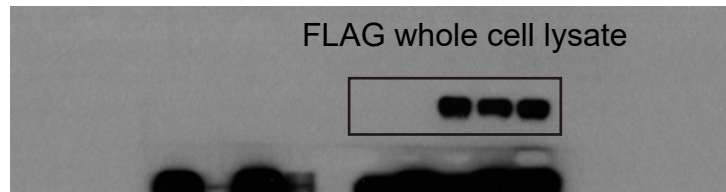

Figure 5F

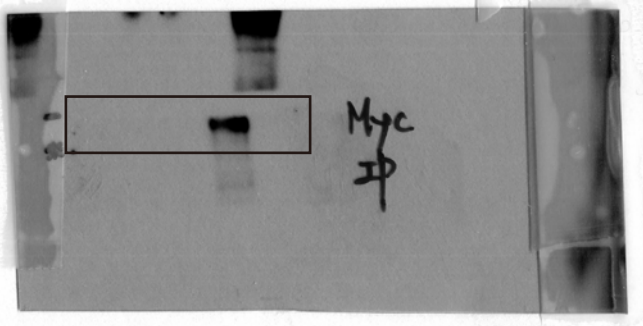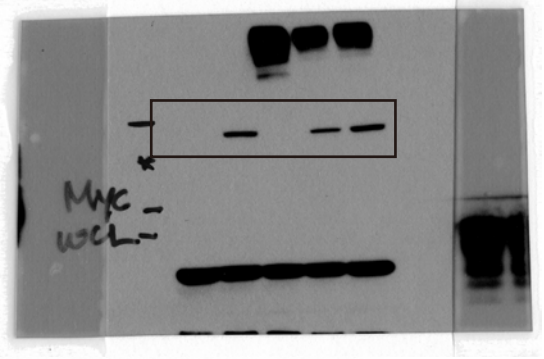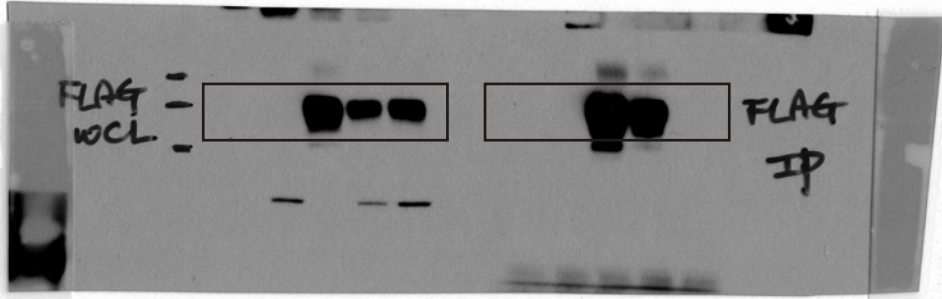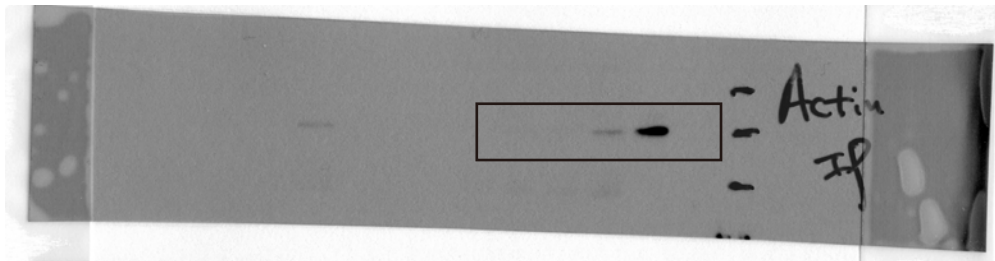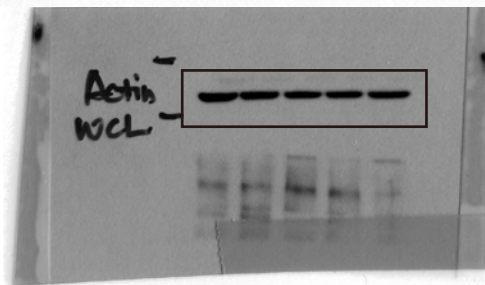

Figure 5H

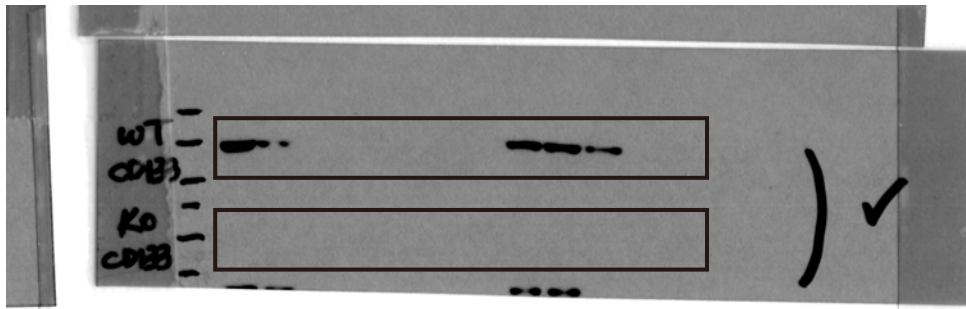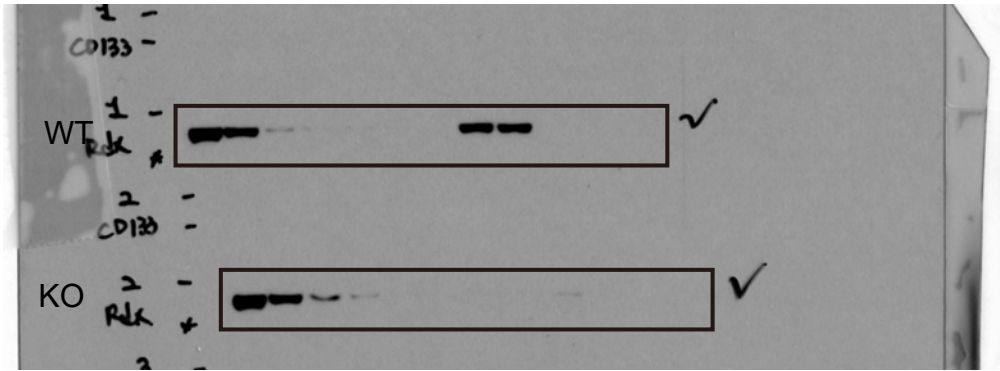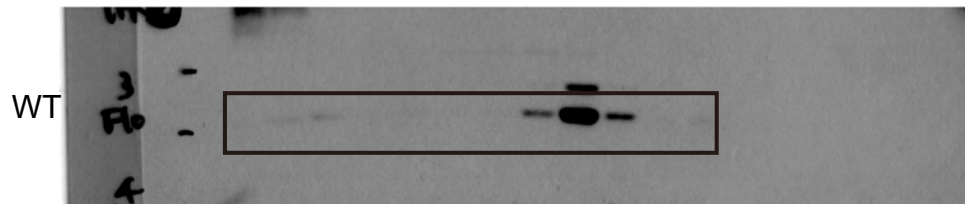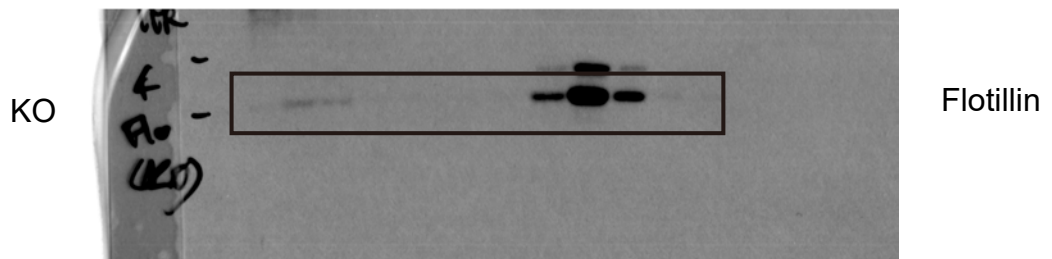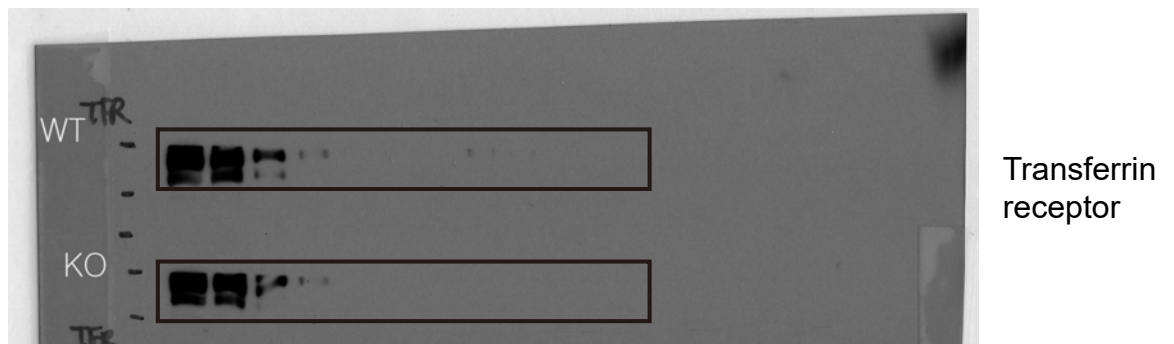

Figure 5I

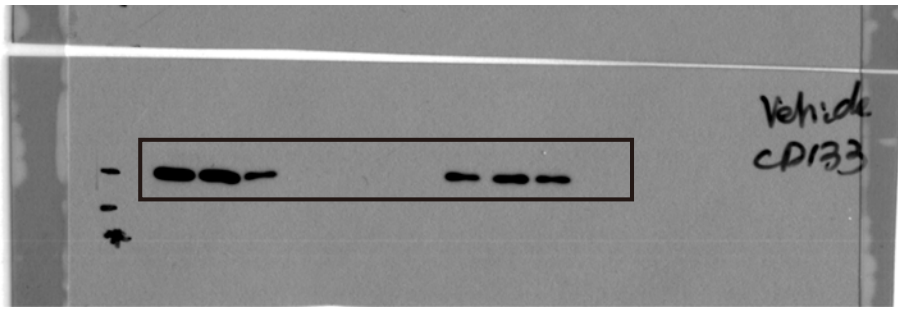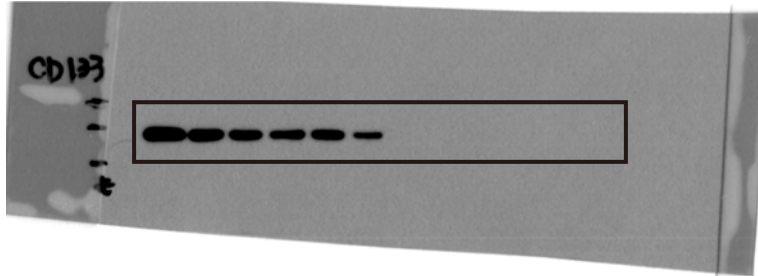

methylbetaCD

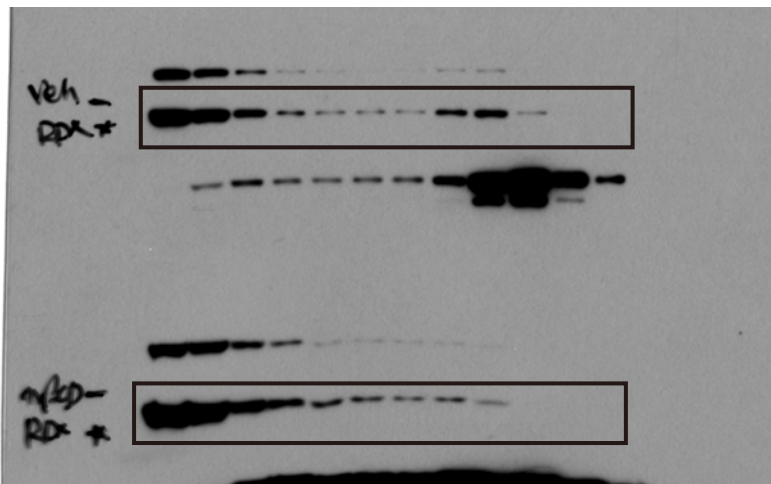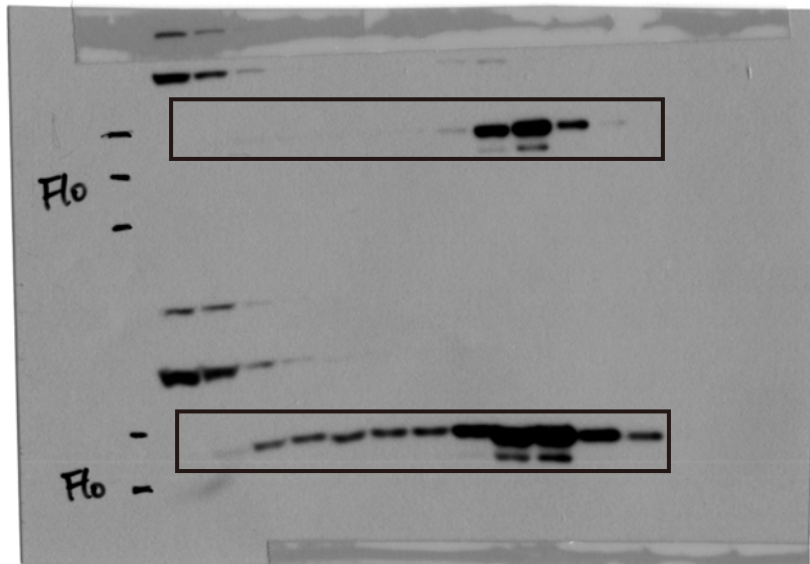

Vehicle

Flo

mCD

Flo

Vehicle

TFR

mCD

TFR
