# Supplementary material
Source: PubMed Central journal article supplement (PMC7645247)

Figure 7A

p-PKA  
substrates

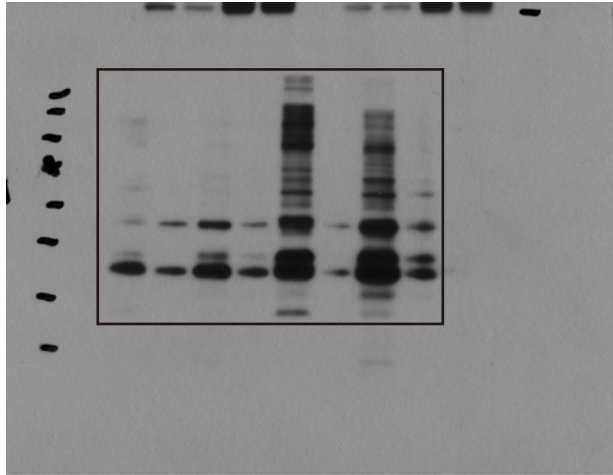

p-CREB

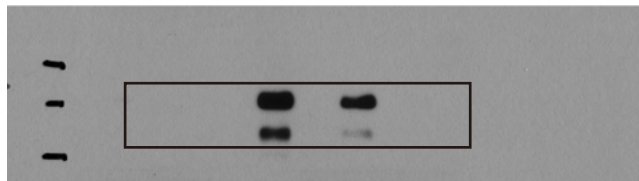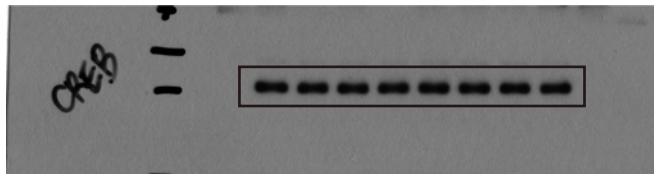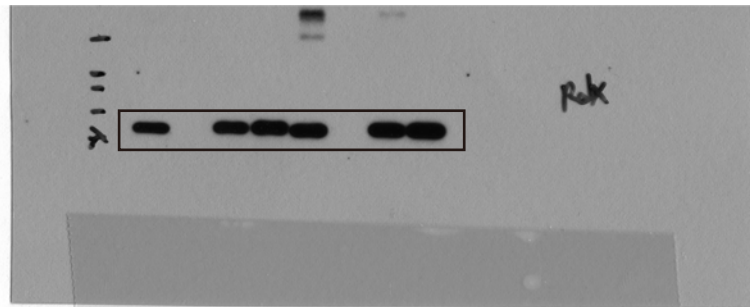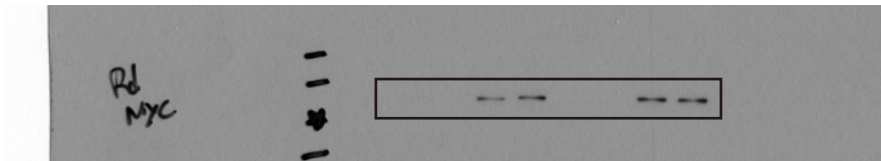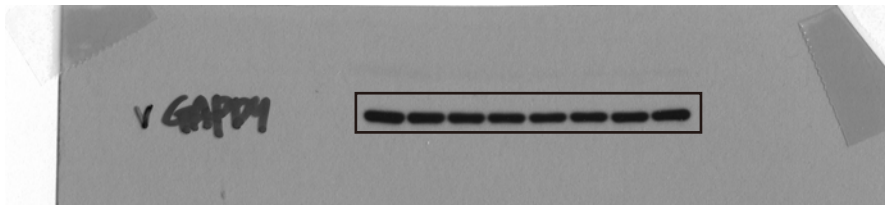

Figure 7B

p-PKA  
substrates

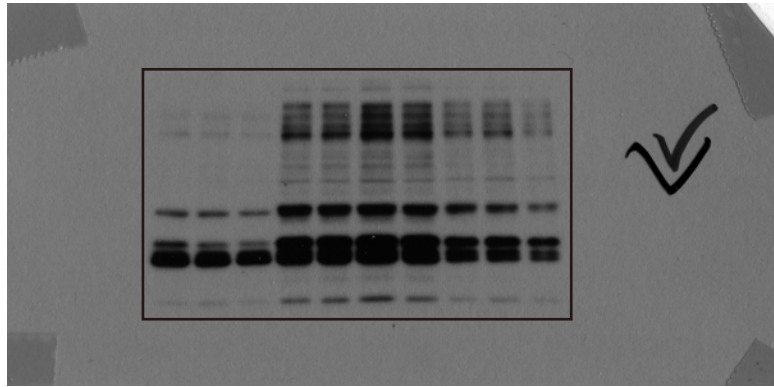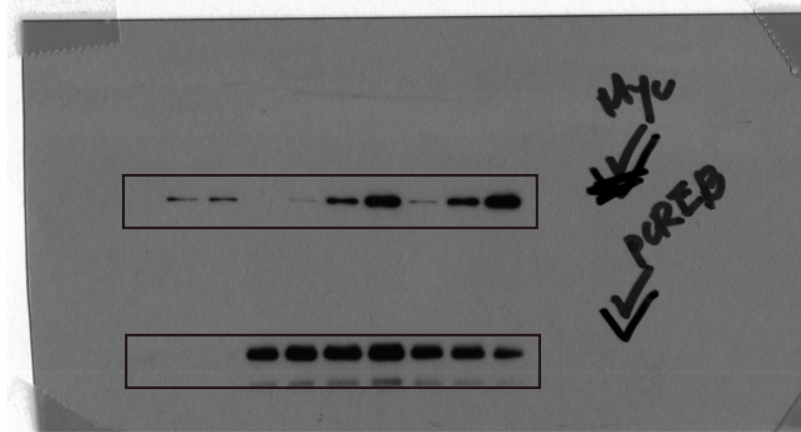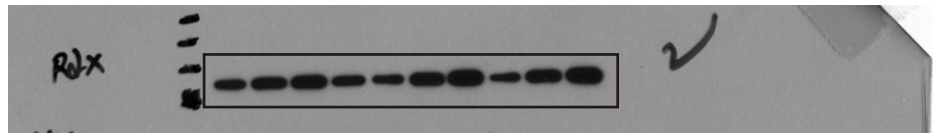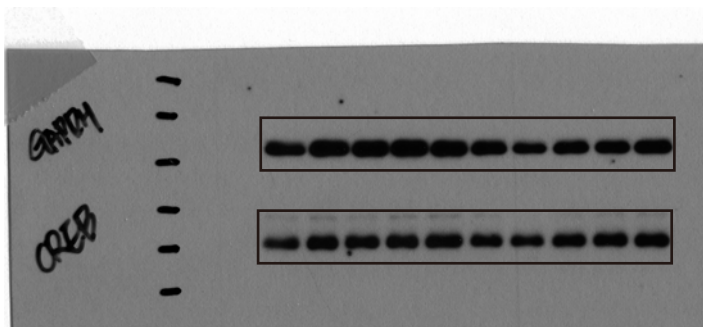

Figure 7H

p-PKA  
substrate

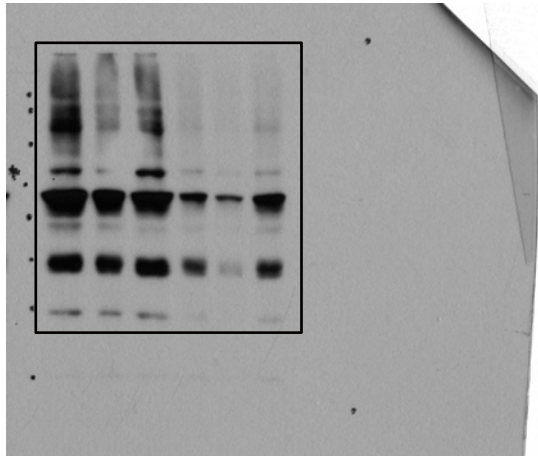

Prom1

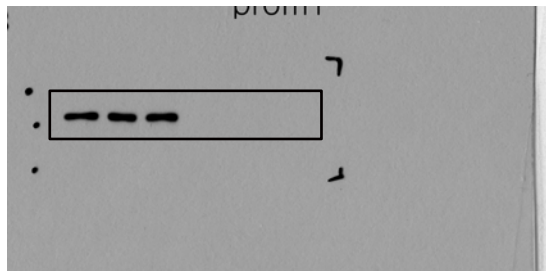

p-CREB

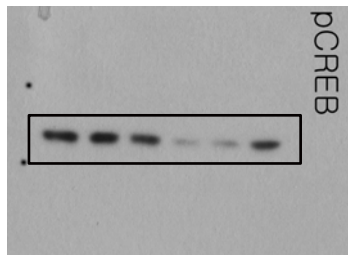

CREB

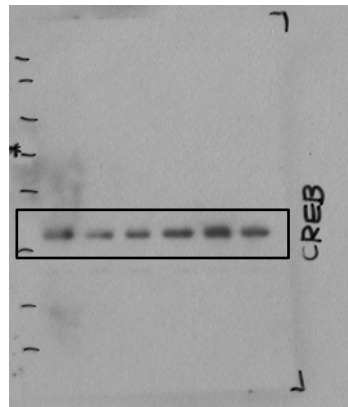

GAPDH

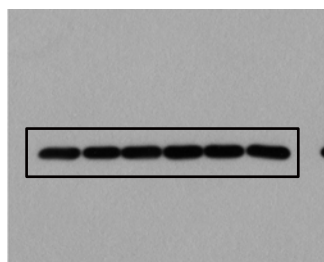

Supplement: EMBR-21-e49416-s009.pdf [file EMBR-21-e49416-s009.pdf]
