# Supplementary material
Source: PubMed Central journal article supplement (PMC7645247)

Figure 1M

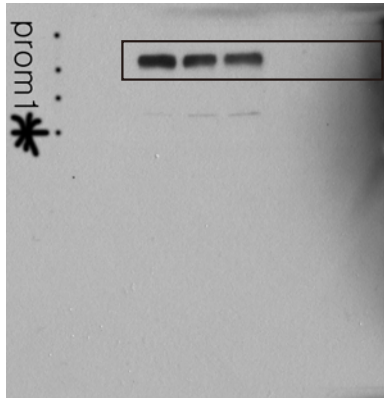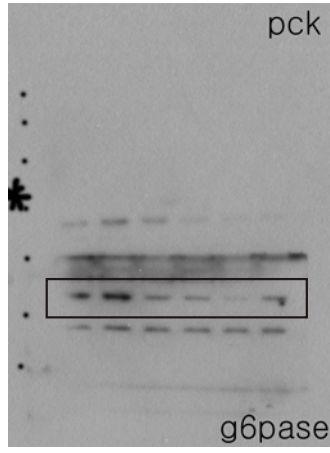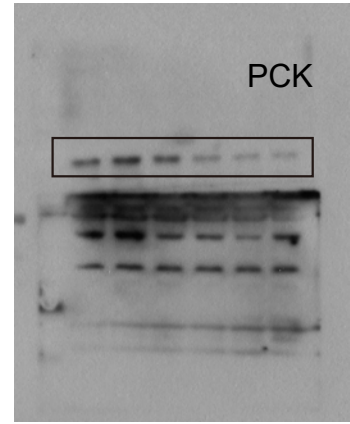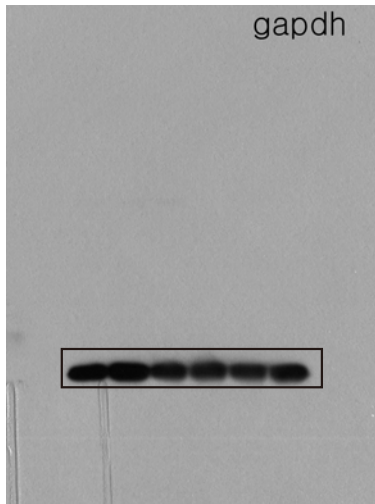

Supplement: EMBR-21-e49416-s003.pdf [file EMBR-21-e49416-s003.pdf]

Figure 2B

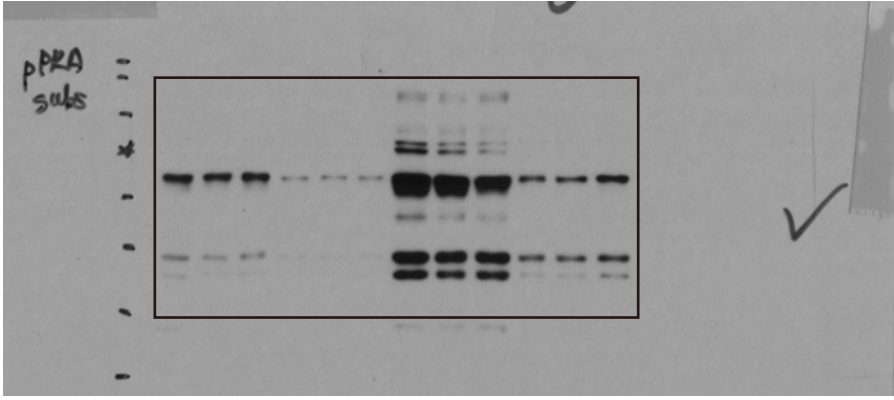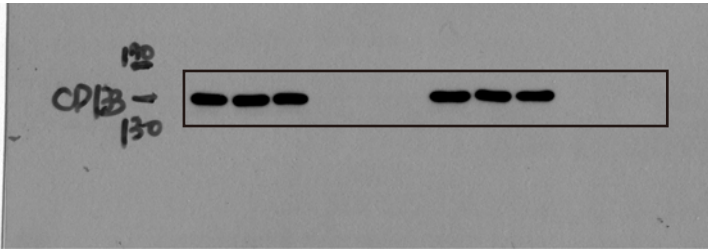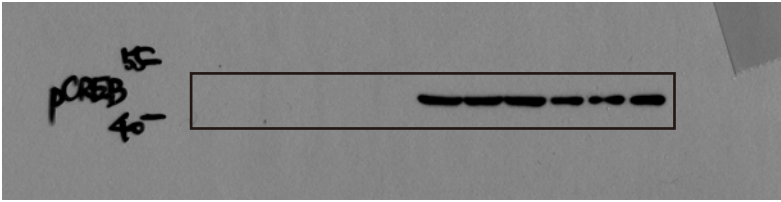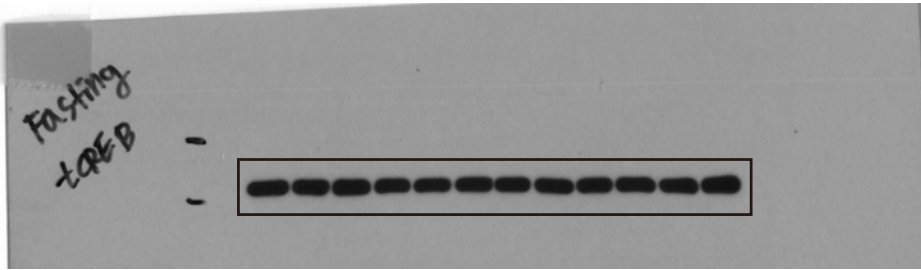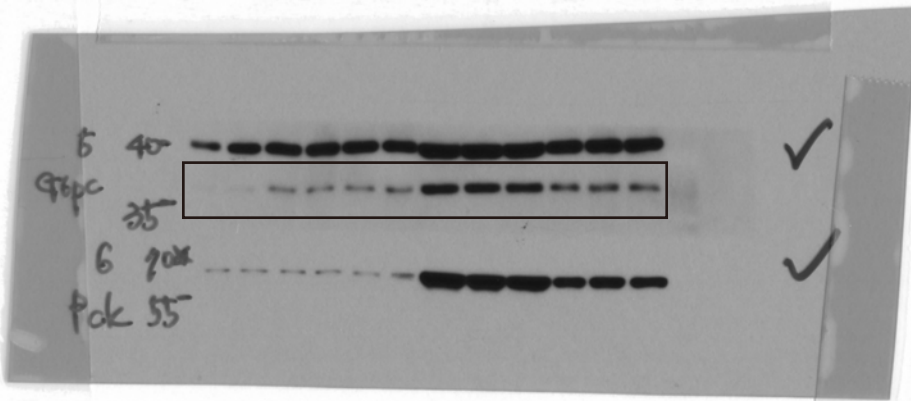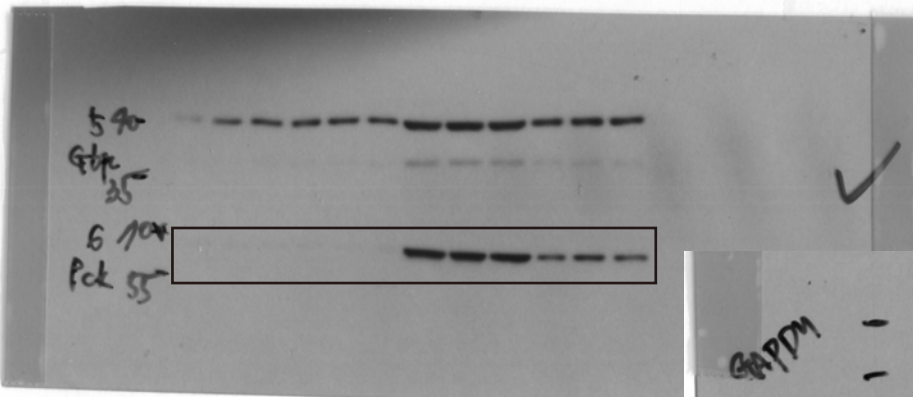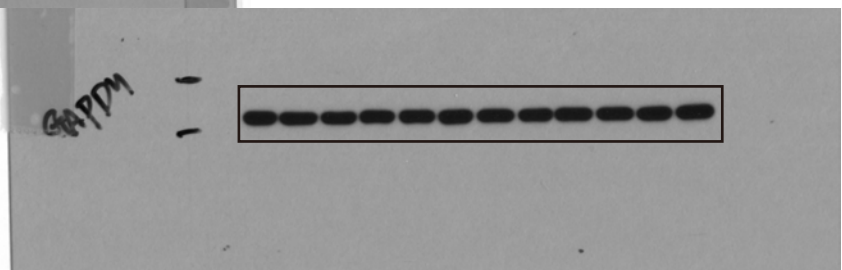

Figure 2G

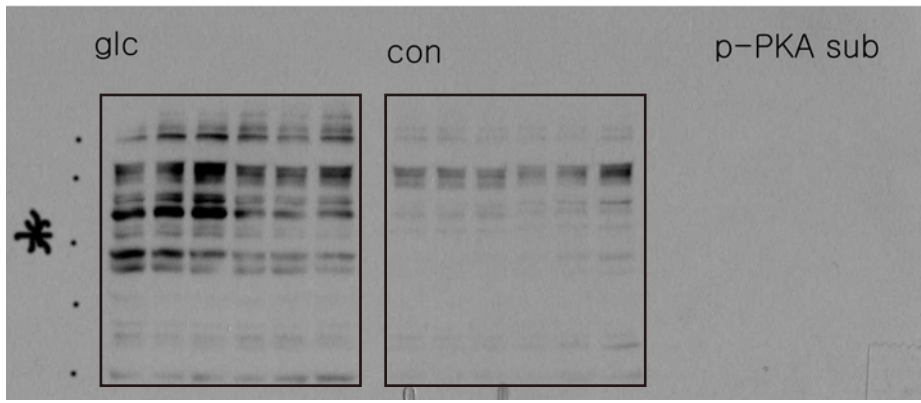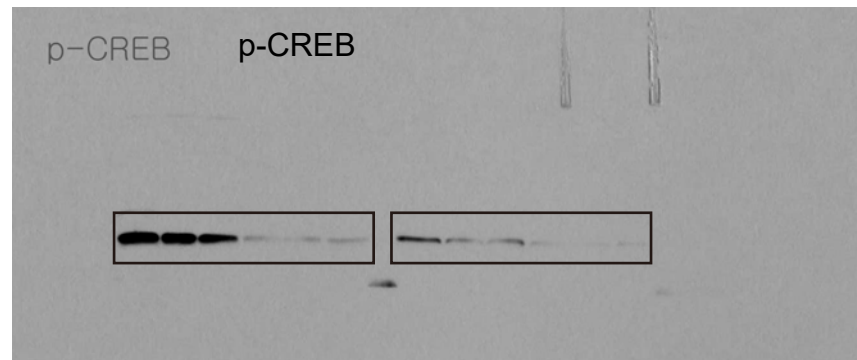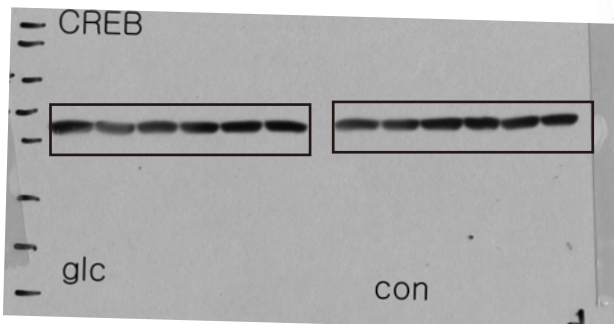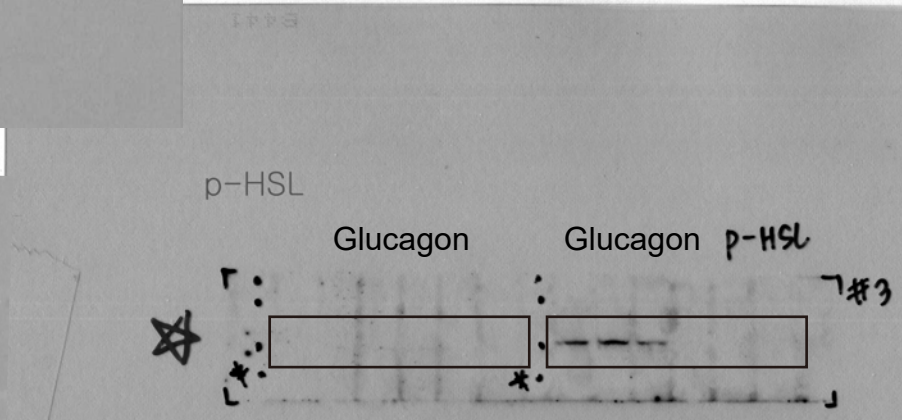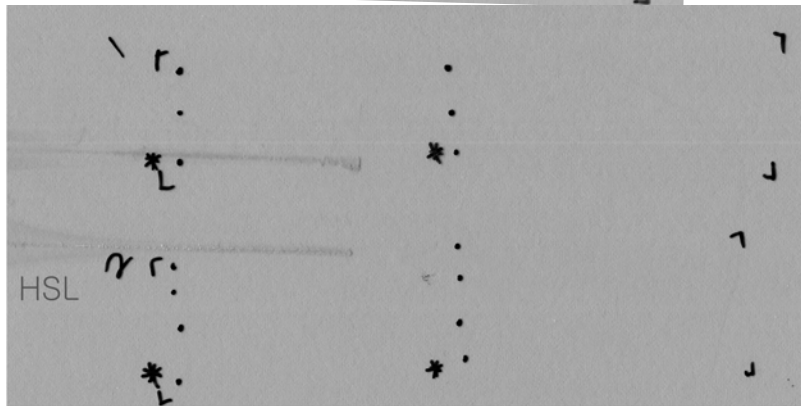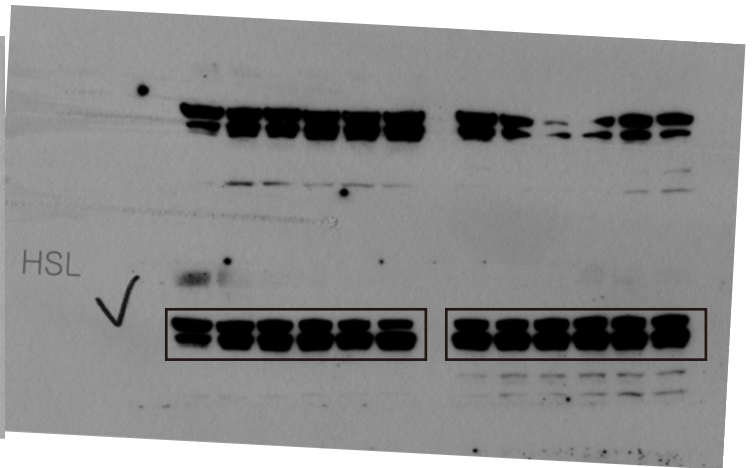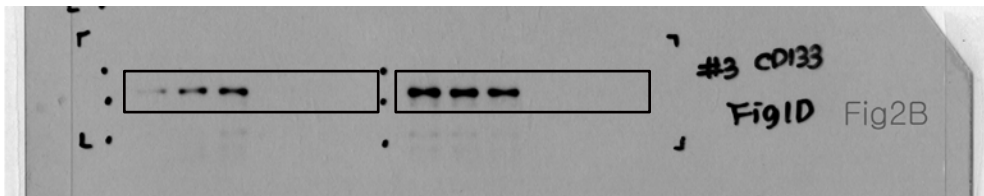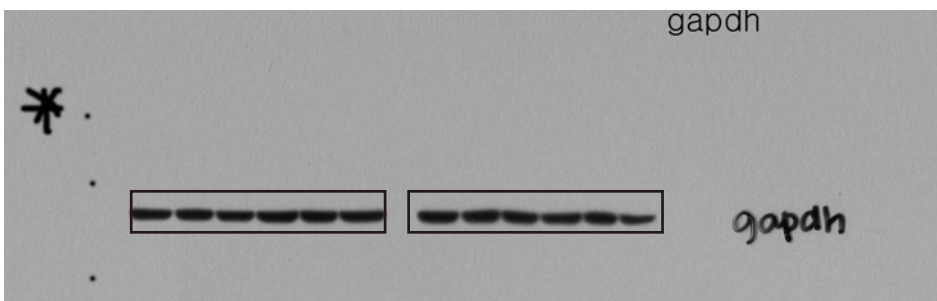

Supplement: EMBR-21-e49416-s004.pdf [file EMBR-21-e49416-s004.pdf]

Figure 3B

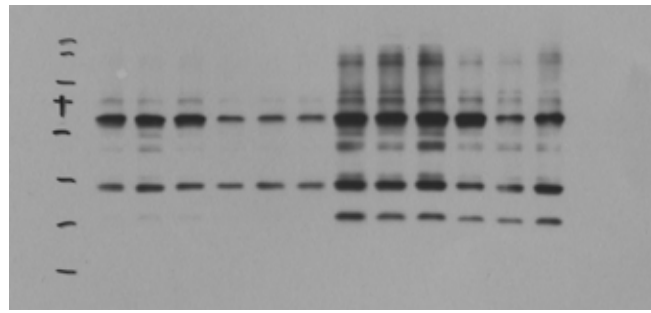

p-PKA substrates

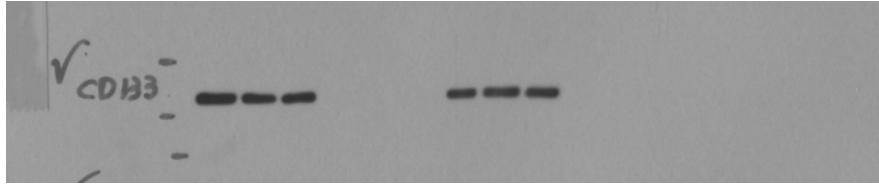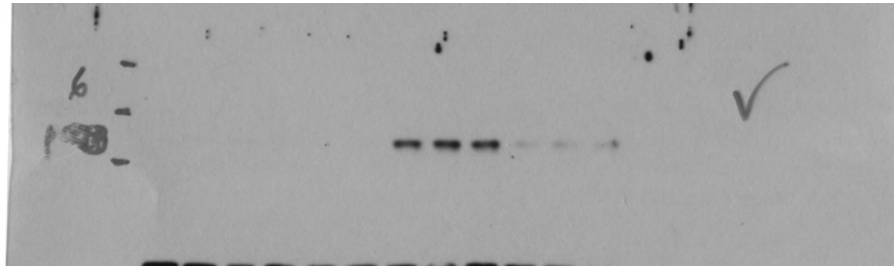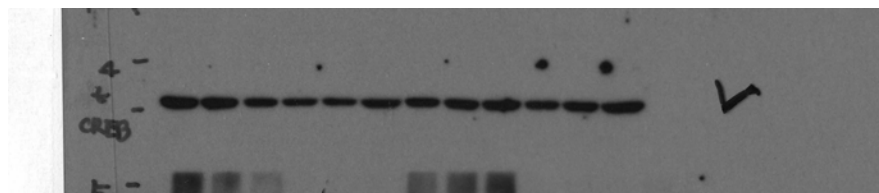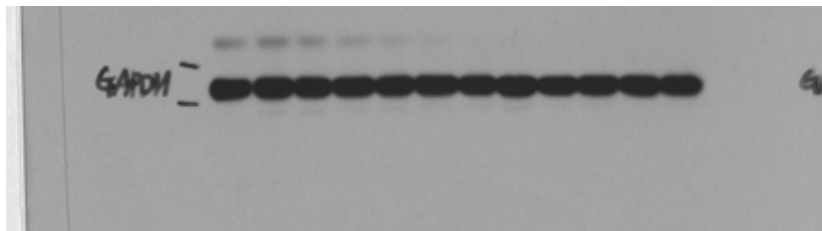

Figure 3G

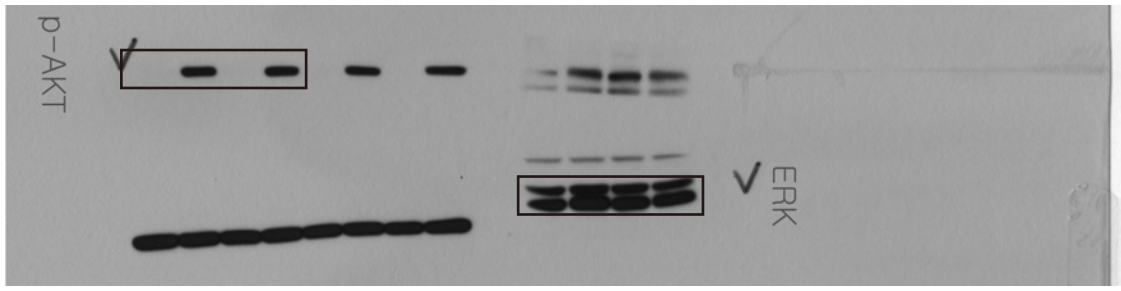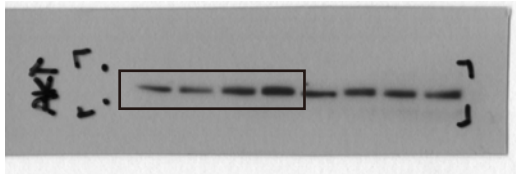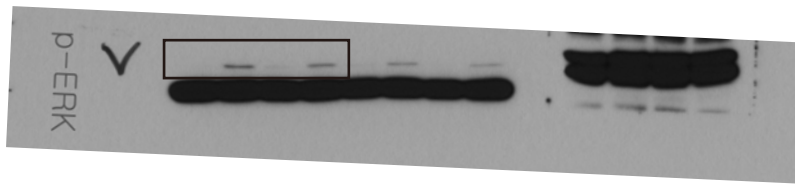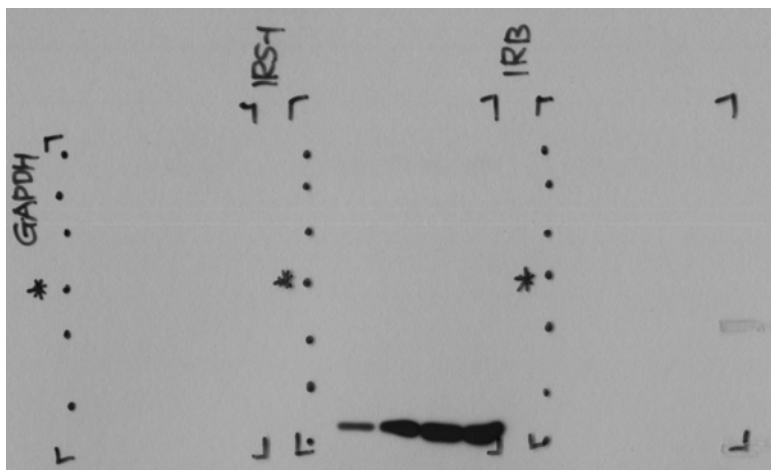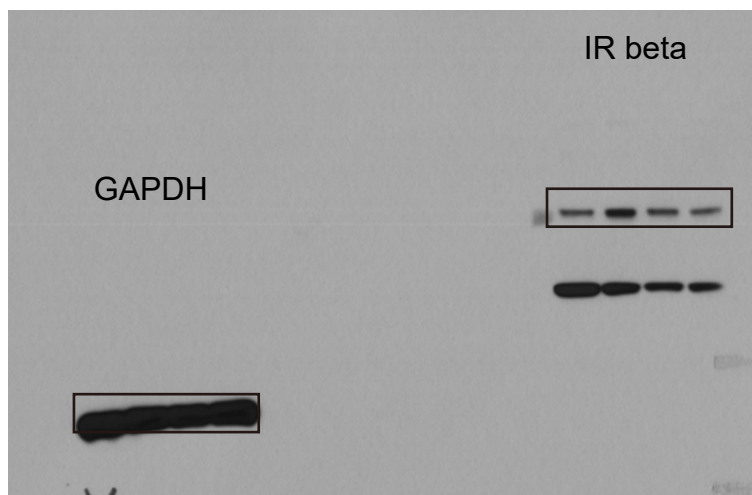

Figure 3I

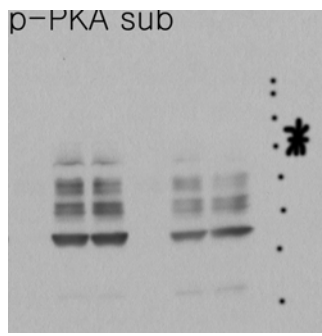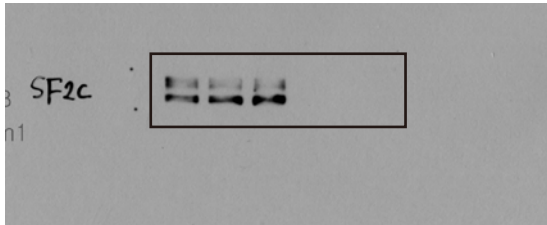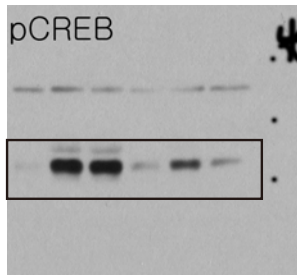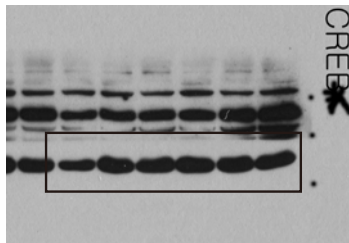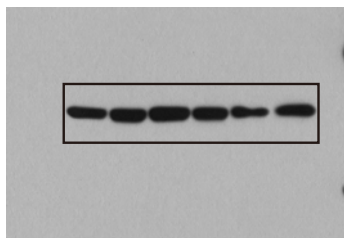

Figure 3L

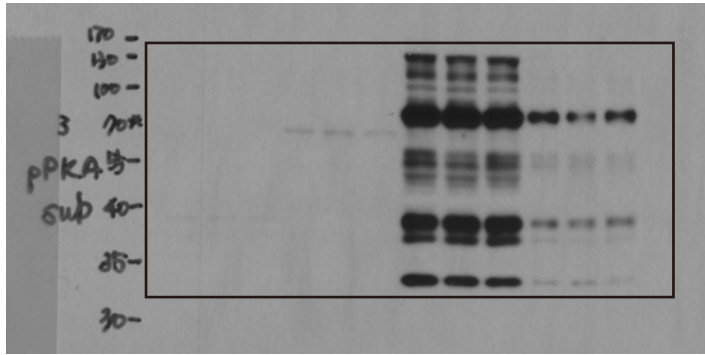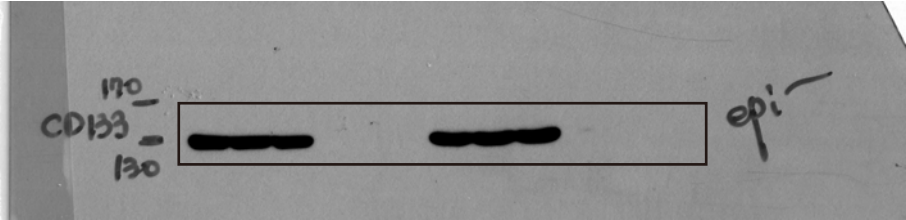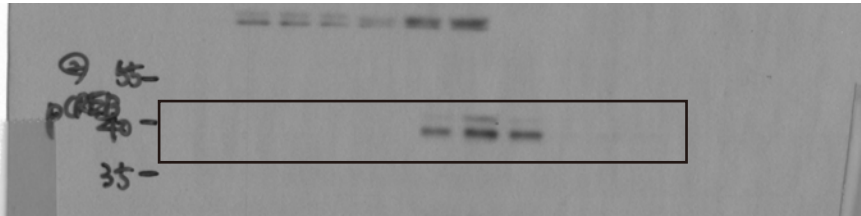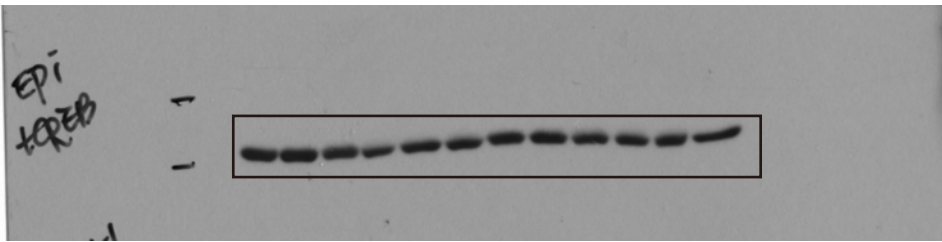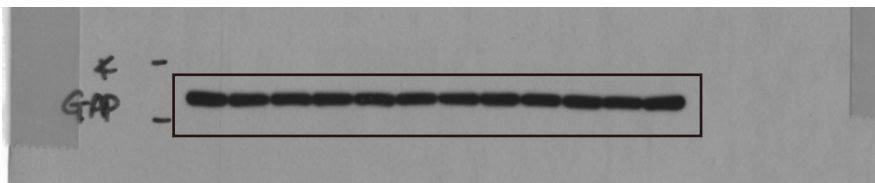

Figure 3N

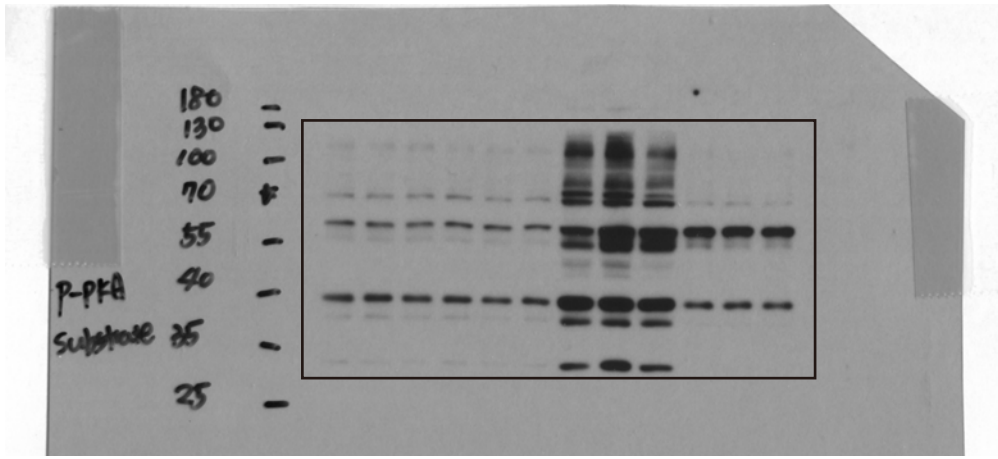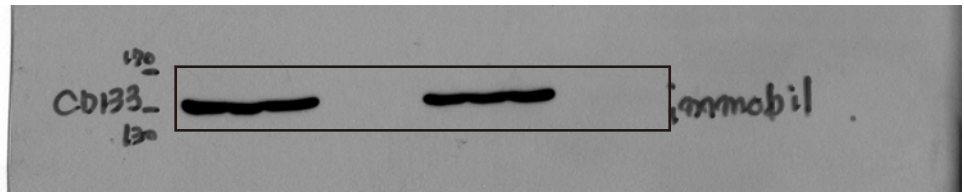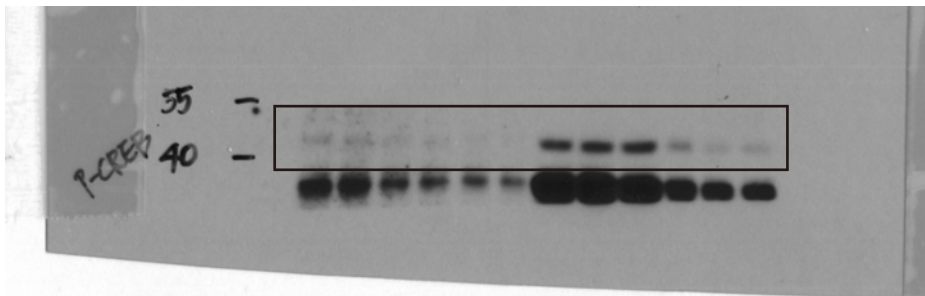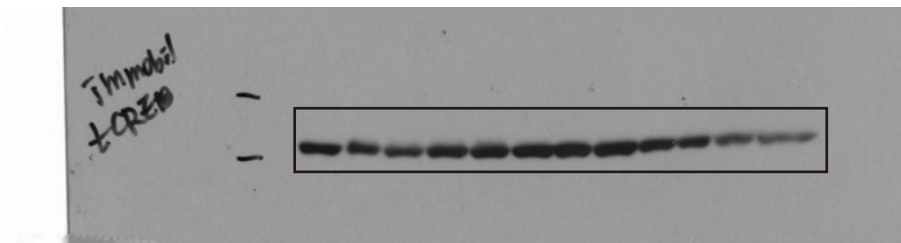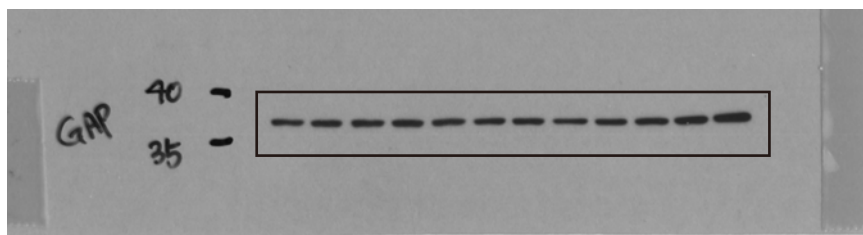

Supplement: EMBR-21-e49416-s005.pdf [file EMBR-21-e49416-s005.pdf]

Figure 4A

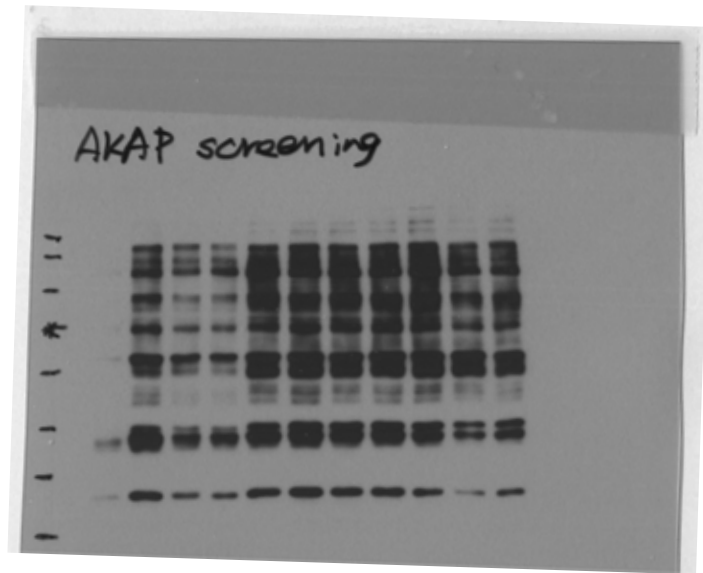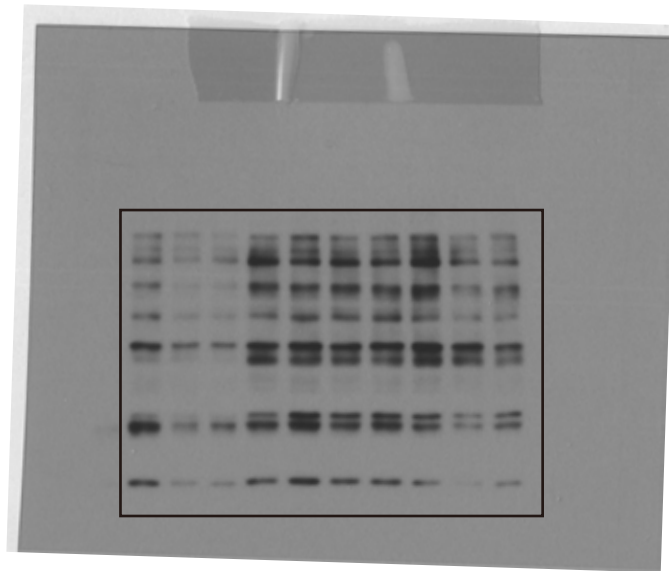

Figure 4C

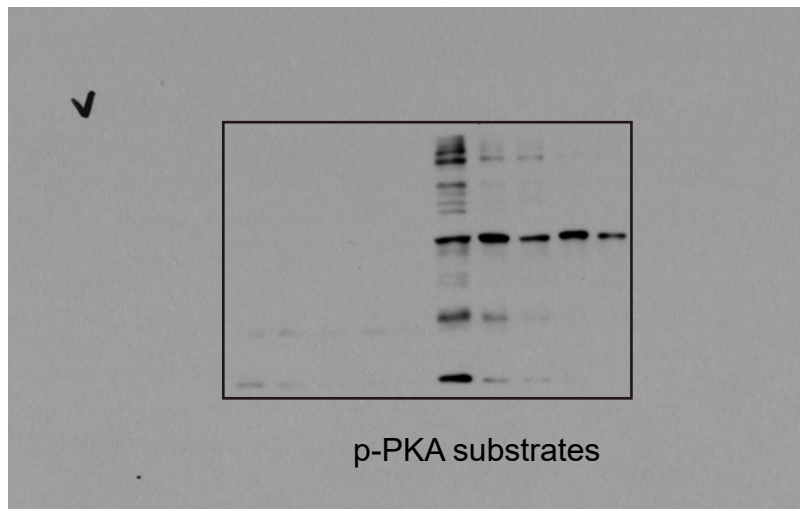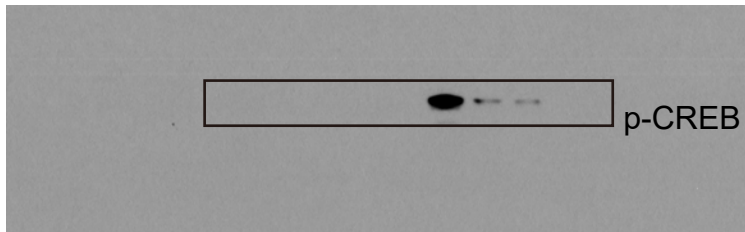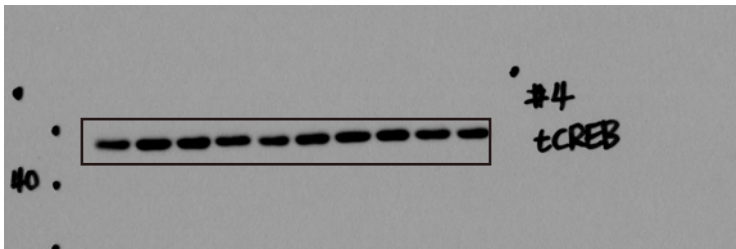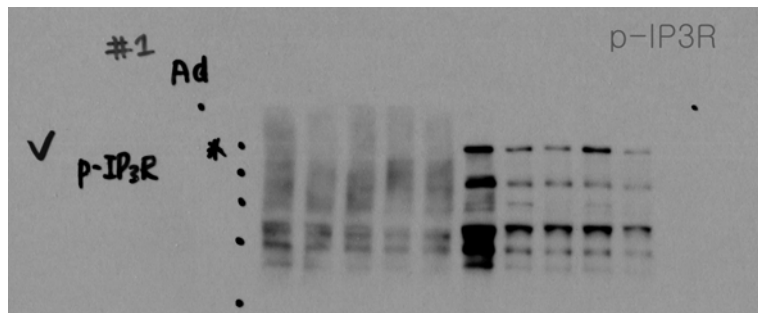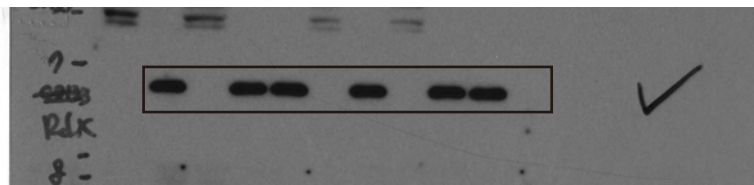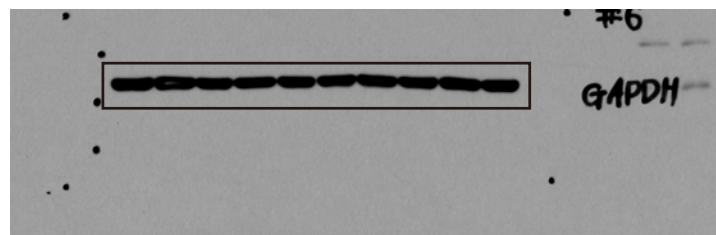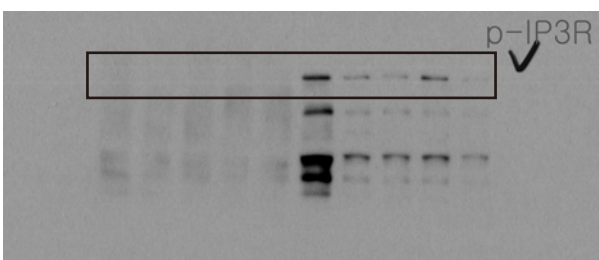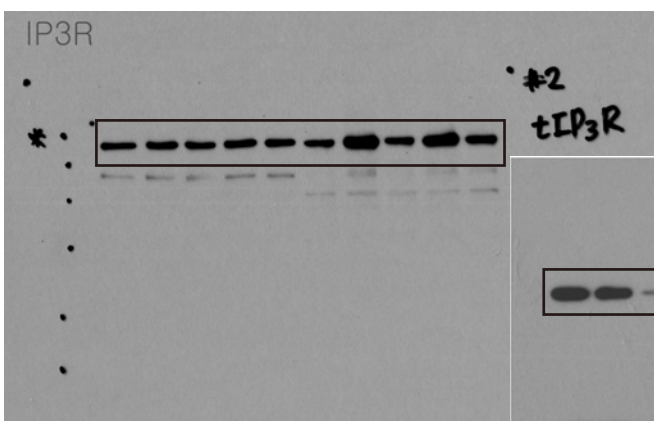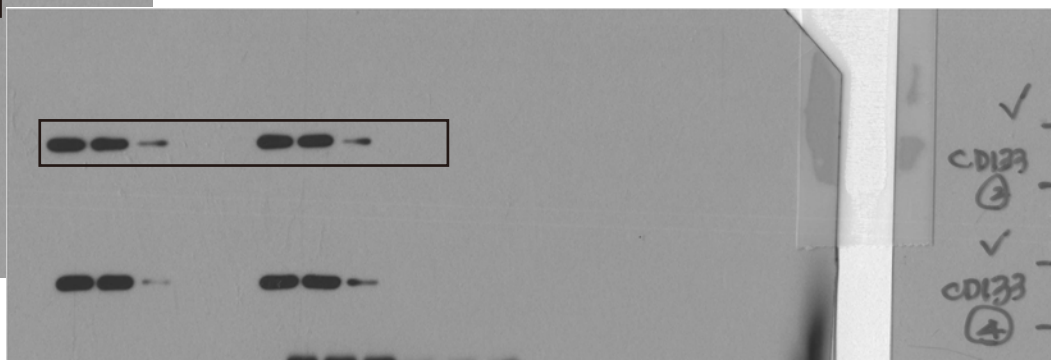

Figure 4F

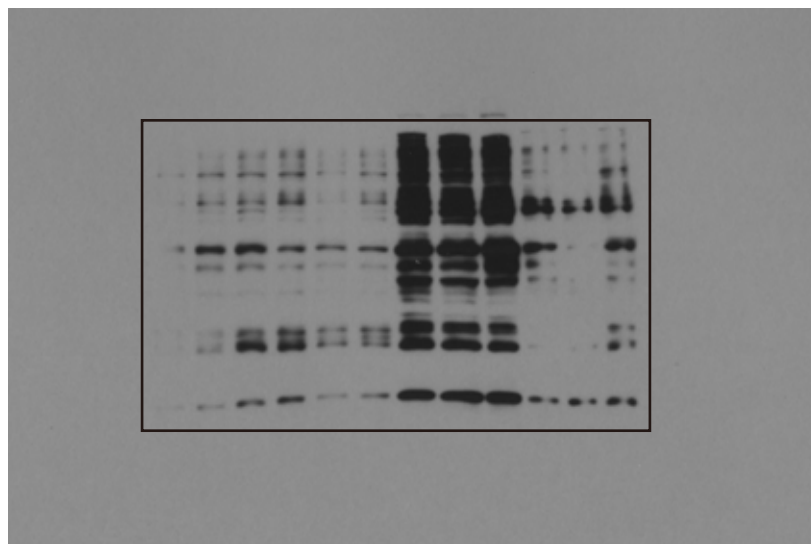

p-PKA substrates

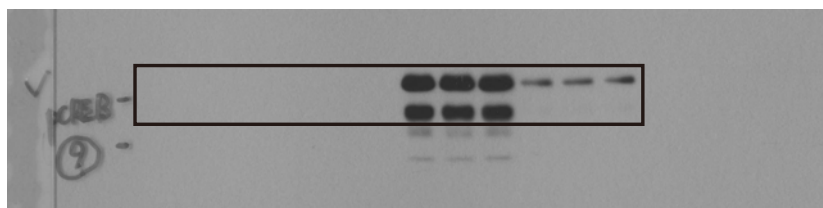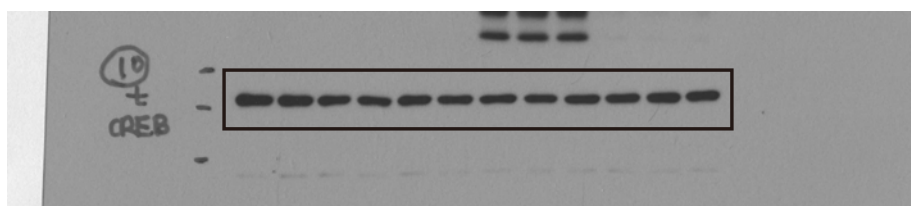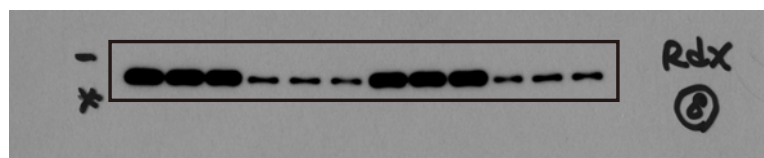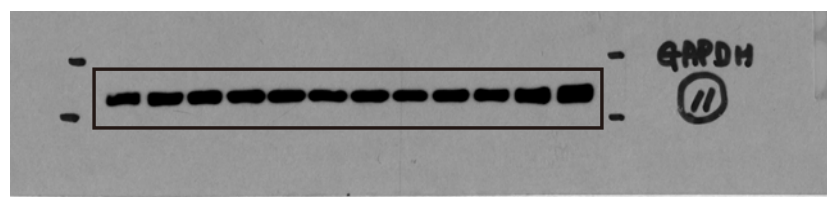

Supplement: EMBR-21-e49416-s006.pdf [file EMBR-21-e49416-s006.pdf]

Figure 6A

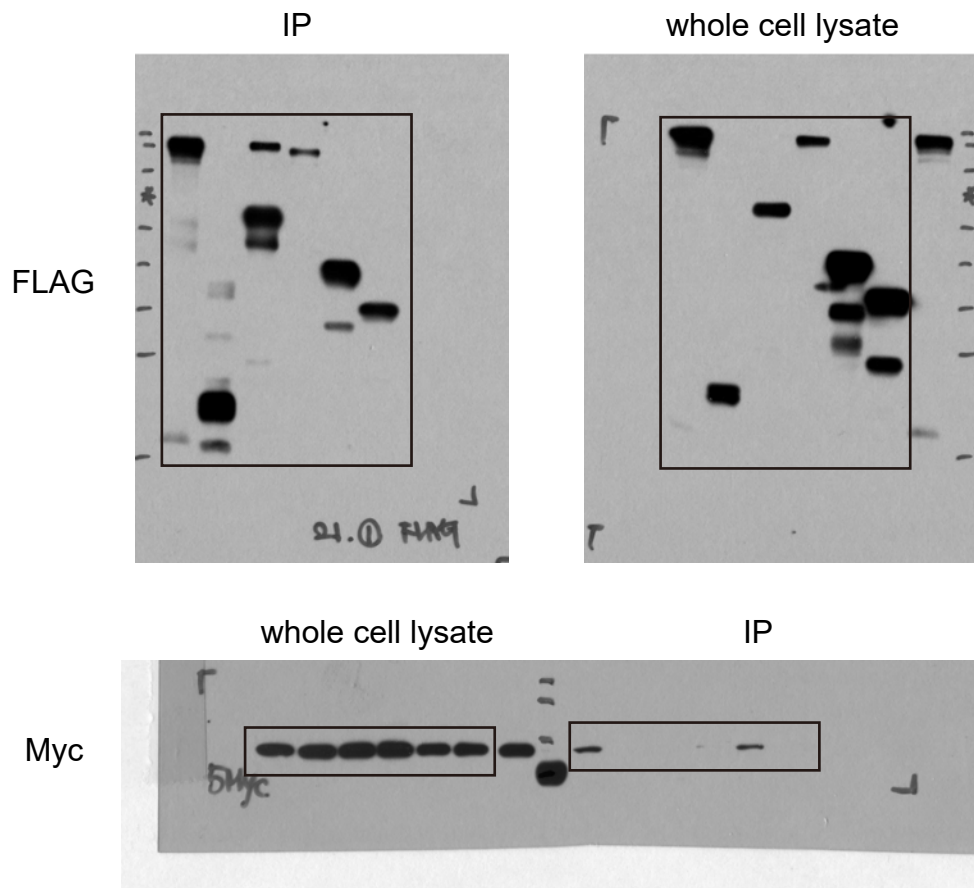

Figure 6B

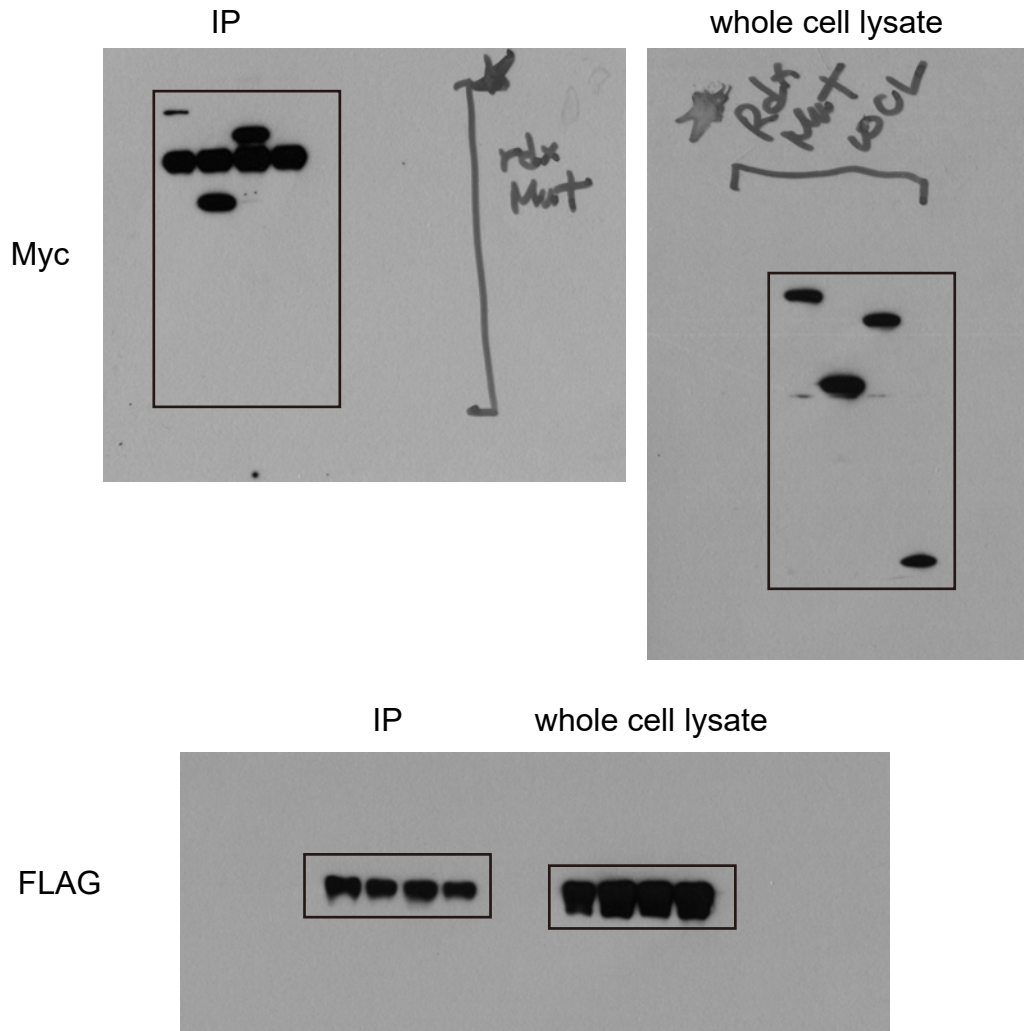

Figure 6C

IP

whole cell lysate

Myc

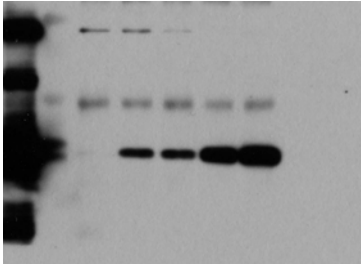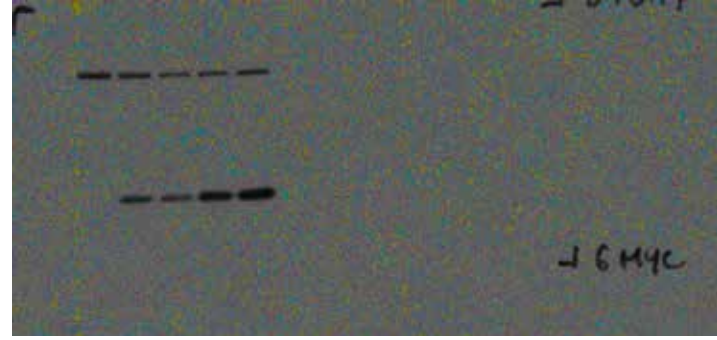

FLAG

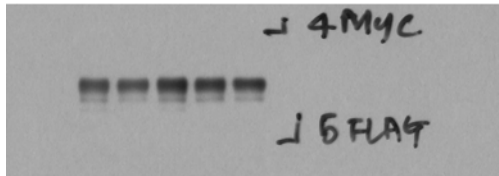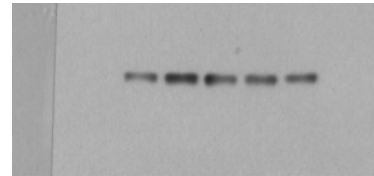

Figure 6F

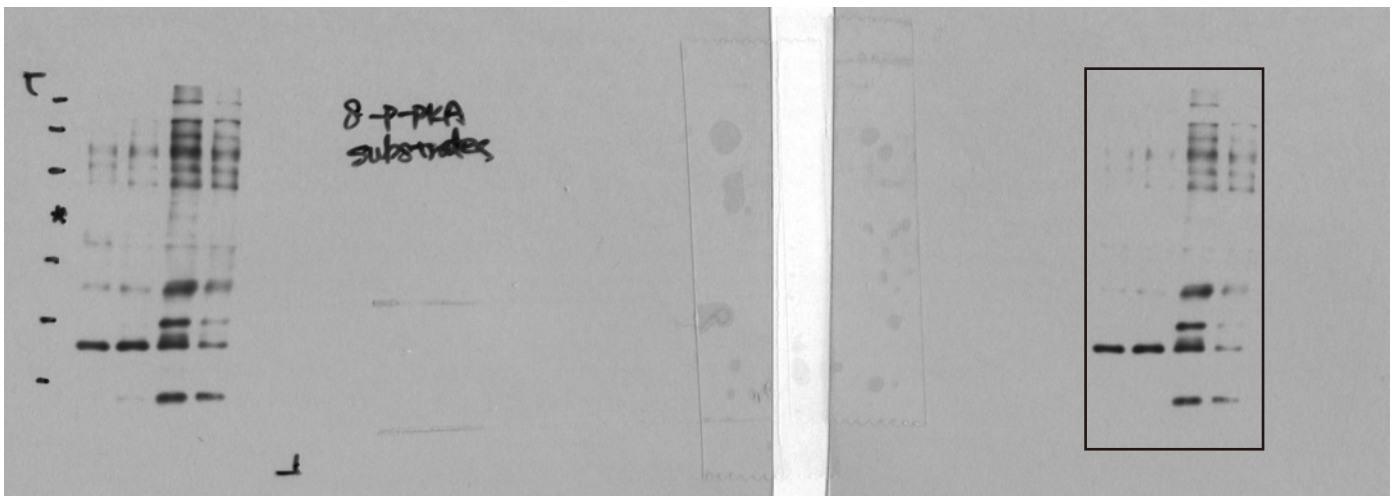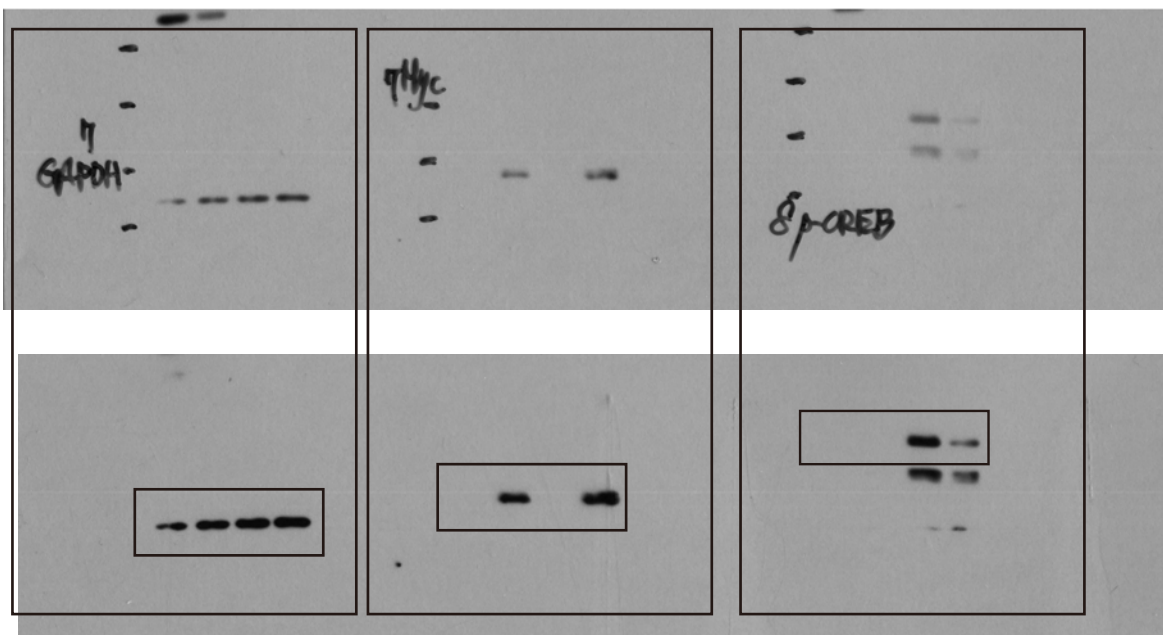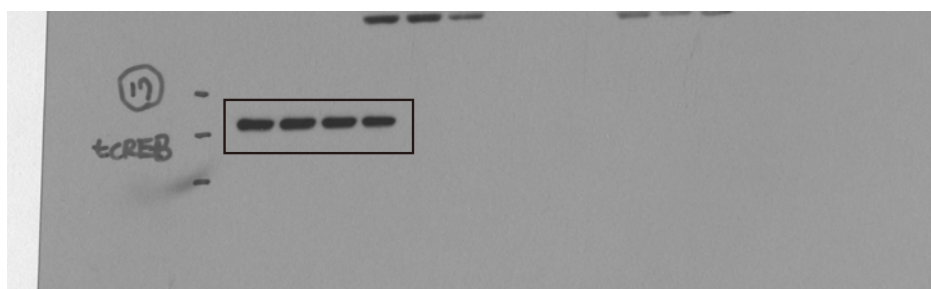

Figure 6H

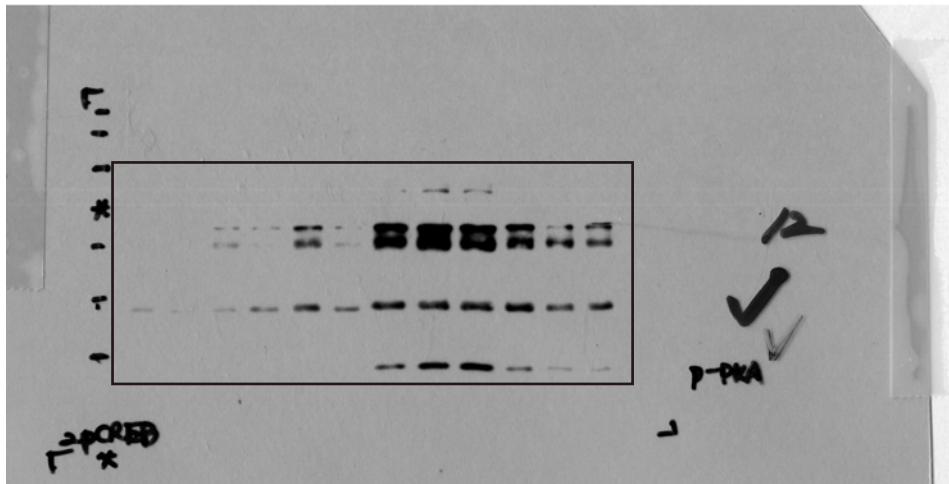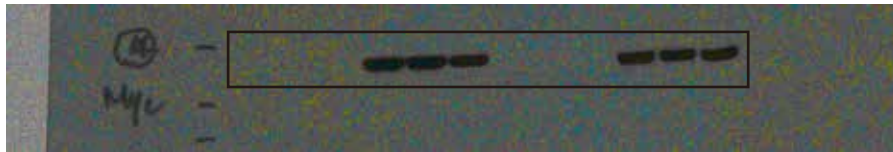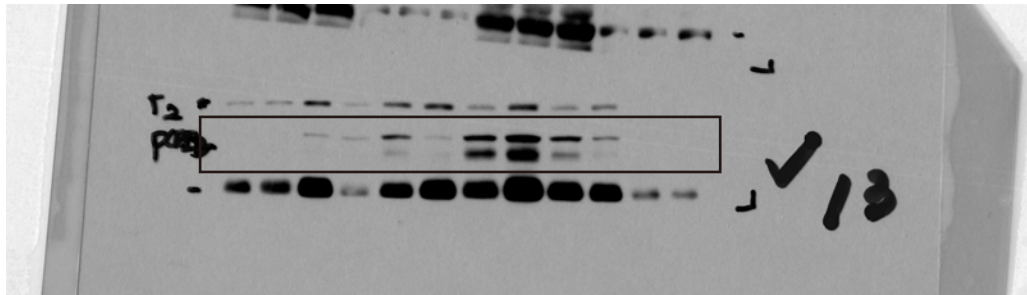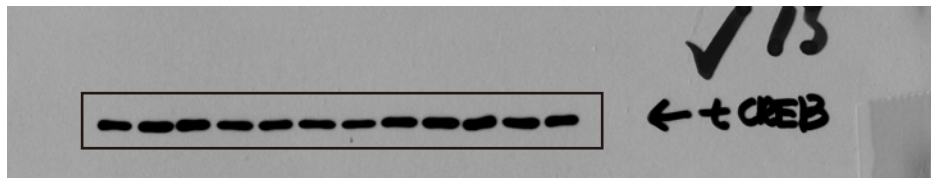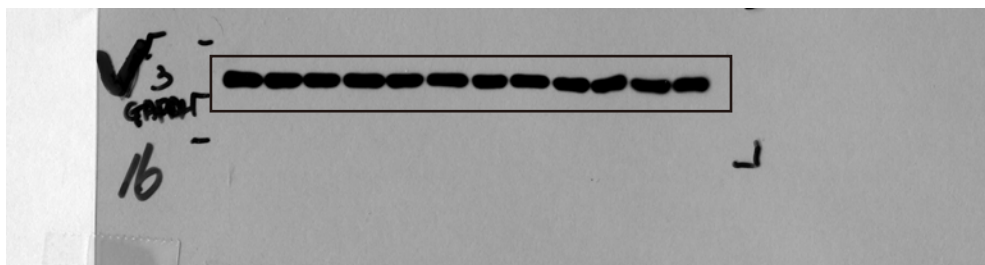

Supplement: EMBR-21-e49416-s008.pdf [file EMBR-21-e49416-s008.pdf]
